# Supplementary material
Source: PubMed Central journal article supplement (PMC4334824)
Supplement: supp_jiu423_jiu423supp.pdf [file supp_jiu423_jiu423supp.pdf]

**Supplementary data**

**Supplementary Table 1. Primers used in this work.**

**Supplementary Table 2. Codon polymorphisms of the *pvdhfr* sequence in non-human primate adapted lines.**

**Supplementary Figure 1. Aligned *pvdhfr* sequences from the Pyr-sensitive wild-type Chesson line, edited Chesson #4909 parasites, the pvDC2- ZFN<sup>*pvdhfr*</sup> plasmid and the ZFN binding site.**

Chesson: ACCACATAACGAAGTAGGAGTAACCGCTTAACCCATGGAAGACCTTTCAGATGTATTTGACATTTACGCCATCTGCGCAT  
 edited Chesson #4909: ACCACATAACGAAGTAGGAGTAACCGCTTAACCCATGGAAGACCTTTCAGATGTATTTGACATTTACGCCATCTGCGCAT  
 pvDC2- ZFN<sup>pvdnfr</sup>: -----GGAAGACCTTTCAGATGTATTTGACATTTACGCCATCTGCGCAT  
 ZFN binding site: -----

Chesson: GCTGCAAGGTCGCCCCACCAGTGAAGGGACAAAGAATGAACCGTTCAGCCCGCGGACCTTTAGGGGTCTGGGCAATAAG  
 edited Chesson #4909: GCTGCAAGGTCGCCCCACCAGTGAAGGGACAAAGAATGAACCGTTCAGCCCGCGGACCTTTAGGGGTCTGGGCAATAAG  
 pvDC2- ZFN<sup>pvdnfr</sup>: GCTGCAAGGTCGCCCCACCAGTGAAGGGACAAAGAATGAACCGTTCAGCCCGCGGACCTTTAGGGGTCTGGGCAATAAG  
 ZFN binding site: -----

Chesson: GGGACTCTCCCATGGAAATGCAACTCCGTCGATATGAAGTACTTCAGCTTCGGTGAACACCTACGTGGATGAGTCAAAGTA  
 edited Chesson #4909: GGGACTCTCCCATGGAAATGCAACTCCGTCGATATGAAGTACTTCAGCTTCGGTGAACACCTACGTGGATGAGTCAAAGTA  
 pvDC2- ZFN<sup>pvdnfr</sup>: GGGACTCTCCCATGGAAATGCAACTCCGTCGATATGAAGTACTTCAGCTTCGGTGAACACCTACGTGGATGAGTCAAAGTA  
 ZFN binding site: -----

171 174 182

Chesson: TGAGAAGCTAAAGTGGAAGAGGGAGAGGTACCTACGAATGGAAGCCTCACAGGGGGGGGGTGACAACACACACGGTGGTG  
 edited Chesson #4909: TGAGAAGCTAAAGTGGAAGAGGGAGAGGTACCTACGAATGGAAGCCTCACAGGGGGGGGGTGACAACACACACGGTGGTG  
 pvDC2- ZFN<sup>pvdnfr</sup>: TGAGAAGCTAAAGTGGAAGAGGGAGAGGTACCTACGAATGGAAGCCTCACAGGGGGGGGGTGACAACACACACGGTGGTG  
 ZFN binding site: -----

Chesson: ACAACGCGGACAAGCTGCAAAAACCTCGTGGTCAATGGGGAGATCCACTGGGAGATCCATCCCCAAGCAGTACAAGCCGCTC  
 edited Chesson #4909: ACAACGCGGACAAGCTGCAAAAACCTCGTGGTCAATGGGGAGATCCACTGGGAGATCCATCCCCAAGCAGTACAAGCCGCTC  
 pvDC2- ZFN<sup>pvdnfr</sup>: ACAACGCGGACAAGCTGCAAAAACCTCGTGGTCAATGGGGAGATCCACTGGGAGATCCATCCCCAAGCAGTACAAGCCGCTC  
 ZFN binding site: -----TCGTGGTCAATGGGGAGATCCACTGGGAGATCCATCCCCAAGCAGTACAAGCCGCTC-----

350

- Mutations linked to pyrimethamine resistance
- Silent mutations engineered to identify transgenic parasites

**Supplementary Table 1.**  
**Primers used in this work**

| Name                   | Sequence 5'-3'                                    | Description                                            |
|------------------------|---------------------------------------------------|--------------------------------------------------------|
| rPLU5                  | CCTGTTGTTGCCTTAAACTCC                             | Primer for <i>Plasmodium sp</i> detection [1]          |
| rPLU6                  | TAAAATTGTTGCAGTTAAACG                             | Primer for <i>Plasmodium sp</i> detection [1]          |
| rVIV1                  | CGCTTCTAGCTTAATCCACATAACTGATAC                    | Primer for <i>P. vivax</i> detection by nested PCR [1] |
| rVIV2                  | ACTTCCAAGCCGAAGCAAAGAAAGTCCTTA                    | Primer for <i>P. vivax</i> detection by nested PCR [1] |
| <i>pvdhfr</i> -5'UTR-F | TCACCGCACCAGTTGATTC                               | <i>pvdhfr-ts</i> 5'UTR forward                         |
| <i>pvdhfr</i> -R1      | CCACCTTGCTGTAAACCAAAAAGTCCAGAG                    | <i>pvdhfr-ts</i> internal reverse [2]                  |
| MS50-F                 | CAAAGGAACATGCTCGAT                                | microsatellite MS50 forward [3] <sup>a</sup>           |
| MS50-R                 | GAATTCTGAAGGAATTAGG                               | microsatellite MS50 reverse [3]                        |
| MS315-F                | TTAACGGTTAATCCTCTATT                              | microsatellite MS315 forward [3] <sup>b</sup>          |
| MS315-R                | TTGTGTCTATTTGGCCATT                               | microsatellite MS315 reverse [3]                       |
| MS92-F                 | TCACTGATCTTTTCGCATG                               | microsatellite MS92 forward [3] <sup>c</sup>           |
| MS92-R                 | TAGTAGCATAGTGGTAGTA                               | microsatellite MS92 reverse [3]                        |
| MS38-F                 | AACAACGCAATGTGGATAA                               | microsatellite MS38 forward [3] <sup>d</sup>           |
| MS38-R                 | TTACGCTTAACTCATTCGT                               | microsatellite MS38 reverse [3]                        |
| MS40-F                 | ATTTGCGTACGGTTAAGAT                               | microsatellite MS40 forward [3] <sup>e</sup>           |
| MS40-R                 | CAGGGTTATTCAATTTGCT                               | microsatellite MS40 reverse [3]                        |
| MS206-F                | TCTTTATGTTGTACTGCTC                               | microsatellite MS206 forward [3] <sup>f</sup>          |
| MS206-R                | ACCACTTACAAAAGTGTGA                               | microsatellite MS206 reverse [3]                       |
| MS116-F                | AAATGCAAGATCCAAGAAAT                              | microsatellite MS116 forward [3] <sup>g</sup>          |
| MS116-R                | GTCGCTCTTCATGTGGCA                                | microsatellite MS116 reverse [3]                       |
| MS196-F                | ATCGTATGTGCGAAGTTAT                               | microsatellite MS196 forward [3] <sup>h</sup>          |
| MS196-R                | AATTATGCTATACGACTTAC                              | microsatellite MS196 reverse [3]                       |
| p1                     | gggccCATCGTTGCCTTTGAAAGAGC                        | Apal <i>vivax Calmodulin</i> 5'UTR forward             |
| p2                     | TcctaggTGTGCTATTCGGCTATGC                         | AvrII <i>vivax Calmodulin</i> 5'UTR reverse            |
| p3                     | ccctcgagCCGGAAGGGTGGAGATGA                        | XhoI <i>vivax hsp86</i> 3' UTR forward                 |
| p4                     | cgggatcCCATGCGCACGCGCAAGTGC                       | BamHI <i>vivax hsp86</i> 3' UTR reverse                |
| p5                     | gggcccGGAGGACCTTTCAGATGTATTTG                     | Apal <i>pvdhfr-ts</i> forward                          |
| p6                     | CGAGCTCCATGCATATTTGTGTATTACAGACC                  | SacI <i>pvdhfr-ts</i> reverse                          |
| p7                     | GGTgATGGGGAGAtcCAcCTGGGAGtcCATCCCCAAGCAGTACAAGCCG | SDM ZFN silent binding site mutations reverse          |
| p8                     | GgaCTCCCAGtGgaTCTCCCCATcACCACCACGTTTTGCAGCTTGTCG  | SDM ZFN silent binding site mutations forward          |
| p9                     | CTTgAGgTCGGTgAtGACCTACGTGGATGAGTCAAAGTATGAGAAGC   | SDM F57L, S58R and T61M forward                        |
| p10                    | GGTCaTCACCGAcTcAAGTACTTCATATCGACGGAGTTGCATTTC     | SDM F57L, S58R and T61M reverse                        |
| p11                    | GGAGAAGCAcCTGGGAGAGCATCCCCAAGCAGTACAAGCCGC        | SDM S117T forward                                      |
| p12                    | GCTCTCCCAGtGCTTCTCCCCATGACCACGACGTTTTGC           | SDM S117T reverse                                      |

<sup>a</sup> MS50 (chromosome 6) microsatellite product size was 124 bp from AMRU-1 and 128 bp from both Chesson and transgenic Chesson parasites

<sup>b</sup> MS315 (Chromosome 3) microsatellite product size was 202 bp from AMRU-1 and 202 bp from both Chesson and transgenic Chesson parasites

<sup>c</sup> MS92 (Chromosome 5) microsatellite product size was 114 bp from AMRU-1 and 120 bp from both Chesson and transgenic Chesson parasites

<sup>d</sup> MS38 (Chromosome 6) microsatellite product size was 390 bp from AMRU-1 and 202 bp from both Chesson and transgenic Chesson parasites

<sup>e</sup> MS40 (Chromosome 6) microsatellite product size was 157 bp from AMRU-1 and 140 bp from both Chesson and transgenic Chesson parasites

<sup>f</sup> MS206 (Chromosome 12) microsatellite product size was 180 bp from AMRU-1 and 168 bp from both Chesson and transgenic Chesson parasites

<sup>g</sup> MS116 (Chromosome 10) microsatellite product size was 178 bp from AMRU-1 and 158 bp from both Chesson and transgenic Chesson parasites

<sup>h</sup> MS196 (Chromosome 8) microsatellite product size was 230 bp from AMRU-1 and 210 bp from both Chesson and transgenic Chesson parasites

[1] Snounou G, Viriyakosol S, Zhu XP, et al. High sensitivity of detection of human malaria parasites by the use of nested polymerase chain reaction. *Mol Biochem Parasitol* 1993; 61:315-20.

[2] Lu F, Lim CS, Nam DH, et al. Mutations in the antifolate-resistance-associated genes dihydrofolate reductase and dihydropteroate synthase in *Plasmodium vivax* isolates from malaria-endemic countries. *Am J Trop Med Hyg* 2010; 83:474-9.

[3] Mu J, Duan J, Makova KD, et al. Chromosome-wide SNPs reveal an ancient origin for *Plasmodium falciparum*. *Nature* 2002; 418:323-6.

**Supplementary Table 2.****Codon polymorphisms of the *pvdhfr* sequence in non-human primate adapted lines**

| Line                                                         | codon 57<br>(169-171) | codon 58<br>(172-174) | codon 61<br>(181-183) | codon 117<br>(349-351) |
|--------------------------------------------------------------|-----------------------|-----------------------|-----------------------|------------------------|
| Drug-sensitive pattern<br>(ARI/Pakistan Accession #: X98123) | F (TTC)               | S (AGC)               | T (ACG)               | S (AGC)                |
| Indonesia-I/CDC                                              | F (TTC)               | S (AGC)               | T (ACG)               | S (AGC)                |
| Vietnam-IV                                                   | L (CTC)               | S (AGC)               | T (ACG)               | S (AGC)                |
| AMRU-I                                                       | L (TTG)               | R (AGG)               | M (ATG)               | T (ACC) at<br>367-369  |
| Indonesia-XIX                                                | F (TTC)               | R (AGG)               | T (ACG)               | N (AAC)                |
| Brazil-I/CDC                                                 | F (TTC)               | R (AGA)               | T (ACG)               | N (AAC)                |
| Chesson                                                      | F (TTC)               | S (AGC)               | T (ACG)               | S (AGC)                |
